# Supplementary material for: Fabrication of 2D Bimetallic Metal-Organic Frameworks with Enhanced Oxidase-Like Activity for AA/ALP Sensing and Antibacterial Application
Source: Research Square preprint supplement (doi:10.21203/rs.3.rs-8847666/v1), 2026-02-24
Supplement: Supplementary file 1 [file 35e7cdf387c150540c29feea.docx]

Table S1. Comparison of Km and Vmax of Co/Cu-MOF with some reported nanozymes.

| Catalyst | Km（mM） | Vmax（10-7 M s-1） | Reference |
| --- | --- | --- | --- |
| CuAg nanoflowers | 0.364 | 0.916 | [2] |
| Ag@ZnS | 4.22 | 0.74 | [3] |
| Fe-N/P-C SAzymes | 0.823 | 1.6103 | [4] |
| PDA-PdCu | 0.127 | 0.8611 | [5] |
| Co/Cu-MOF | 0.122 | 2.591 | This Work |

Table S2. Comparison of the present method with recently reported methods for AA detection.

| Analytical  method | Material | Linear range (µM) | LOD (µM) | Reference |
| --- | --- | --- | --- | --- |
| Colorimetric | scandium-MOF | 0.2-20 | 0.174 | [6] |
| Colorimetric | Ce-BPyDC | 1-20 | 0.28 | [7] |
| Colorimetric | MVCM MOF | 20-500 | 3.57 | [8] |
| Smartphone | Fe-P/N-C SAN | 0.5-100 | 0.315 | [4] |
| Fluorescence | MnO2 nanosheets | 1.5-100 | 0.45 | [9] |
| Fluorescence | Eu MOF | 0-3 | 0.32 | [10] |
| Colorimetric | Co/Cu-MOF | 0.1-28 | 0.091 | This work |

Table S3. Comparison of the present method with recently reported methods for ALP detection.

| Analytical  method | Material | Linear range (U/L) | LOD (U/L) | Reference |
| --- | --- | --- | --- | --- |
| Fluorescence | AgNCs | 1-100 | 0.63 | [11] |
| Fluorescence | Fe/Eu-MOF | 1-200 | 0.6 | [12] |
| Fluorescence | Ce(Ⅳ) | 0-250 | 2.3 | [13] |
| Fluorescence | Cu-C3N4-550 | 1-30 | 0.42 | [14] |
| Colorimetric | PDA | 1-200 | 2.8 | [15] |
| Colorimetric | N-CQD | 5-360 | 1.1 | [16] |
| Colorimetric | Co/Cu-MOF | 0.2-6.5 | 0.12 | This work |

Table S4. Results of detecting AA in human serum samples.

| Sample | Add (µM) | Total (µM) | Recovery (%) | RSD (%, n=3) |
| --- | --- | --- | --- | --- |
| Human serum | 0 | 0.25 | / | 1.06 |
| 0.5 | 0.747 | 99.47 | 1.91 |
| 5 | 5.198 | 98.95 | 0.43 |
| 10 | 9.442 | 91.92 | 3.35 |

Table S5. Results of detecting ALP in human serum samples.

| Sample | Adde (U/L) | Total (U/L) | Recovery (%) | RSD (%, n=3) |
| --- | --- | --- | --- | --- |
|  | 0 | 1.53 | / | 0.22 |
| Human serum | 0.5 | 2.06 | 106 | 0.25 |
| 1 | 2.6 | 107 | 0.78 |
|  | 2 | 3.7 | 108.5 | 1.89 |
