# Supplementary material for: Fabrication of 2D Bimetallic Metal-Organic Frameworks with Enhanced Oxidase-Like Activity for AA/ALP Sensing and Antibacterial Application
Source: Research Square preprint supplement (doi:10.21203/rs.3.rs-8847666/v1), 2026-02-24
Supplement: Supplementary file 3 [file 86a37dc10ed28834fc3d34d2.docx]

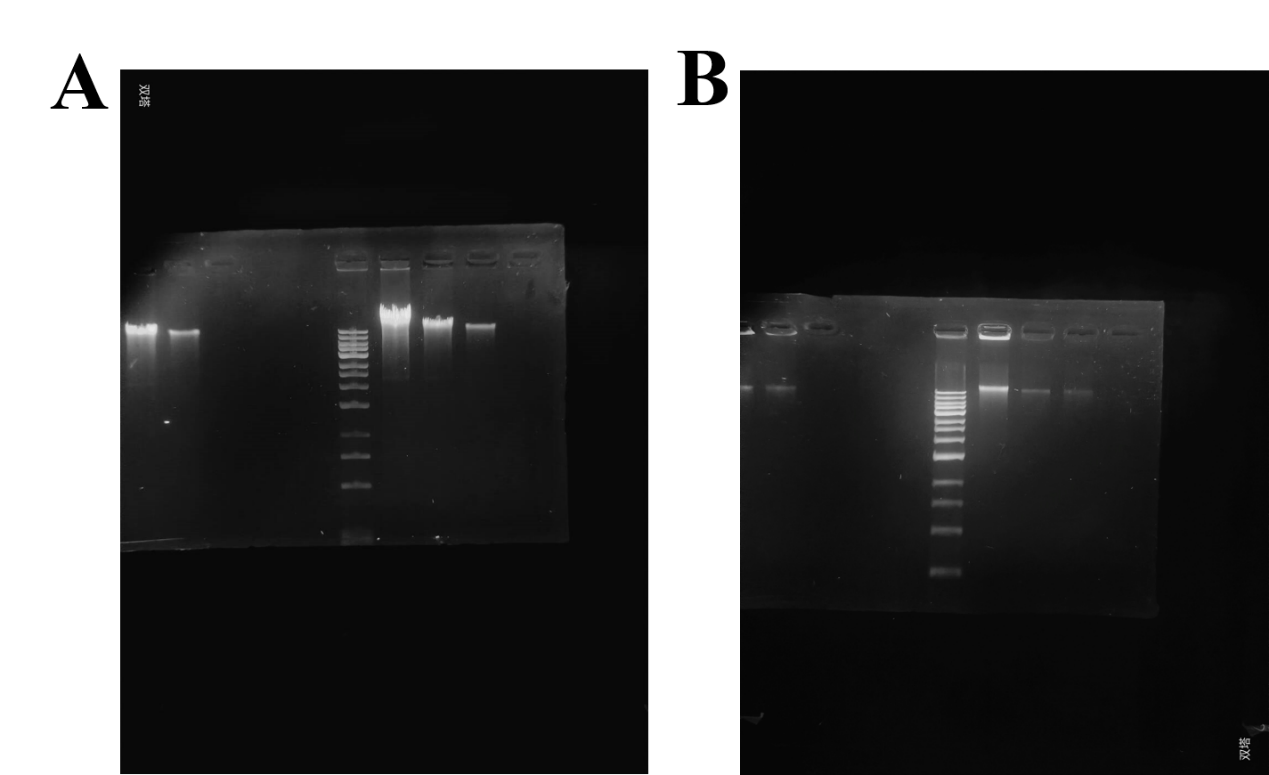


Fig. S5. Agarose gel electrophoresis analysis of genomic DNA from *E. coli* (A) and *S. aureus* (B) treated with various concentrations of the Co/Cu-MOF.
