# Supplementary material for: Fabrication of 2D Bimetallic Metal-Organic Frameworks with Enhanced Oxidase-Like Activity for AA/ALP Sensing and Antibacterial Application
Source: Research Square preprint supplement (doi:10.21203/rs.3.rs-8847666/v1), 2026-02-24
Supplement: Supplementary file 4 [file d7125a46b630ab5d5ce48459.docx]

**Fabrication of 2D Bimetallic Metal-Organic Frameworks with Enhanced Oxidase-Like Activity for AA/ALP Sensing and Antibacterial Application**

Wei Li1, Shujing Zhou1, Jiale Hu1, Yihong Nan1, Pei Luo1, Yun Zhang1, Ziyuan Li1, Zhongsheng Yi1, Jianmei Zou1,*

*1.Guangxi Key Laboratory of Electrochemical and Magnetochemical Function Materials, Guilin University of Technology, 12 Jiangan Road, Guilin 541004, China.*

* Corresponding author.

*E-mail address:* 2019136@glut.edu.cn (Jianmei Zou)

**Synthesis of Co-MOF and Cu-MOF**

1.104 g of Co(NO3)2 and 1.8 g of 2-methylimidazole (2-MIM) were separately dissolved in 105 mL of ultrapure deionized water. The two precursor solutions were homogenously mixed and allowed to react under constant magnetic stirring for 2 h. Then, the mixture was transferred to a light-shielded chamber and subjected to static incubation for 24 h. Afterward, the supernatant was decanted, and the precipitate was collected via centrifugation at 5,000 rpm for 5 min. The obtained solid product was sequentially washed twice with deionized water and three times with anhydrous ethanol to remove unreacted precursors and impurities. The product was dried in a vacuum oven at 60°C for 4 h to yield Co-MOF powder, which was thereafter stored in a desiccator for future experimental use.

Cu-MOF was fabricated following the same procedure as Co-MOF, but using an aqueous copper nitrate solution as the metal precursor.

**Intracellular protein leakage under Co/Cu-MOF stress**

The extent of protein leakage from *E. coli* and *S. aureus* under Co/Cu-MOF treatment was quantitatively determined via the Bradford assay[1]. Briefly, the target bacterial strains were exposed to Co/Cu-MOF at a final system concentration of 266.7 μg/mL, followed by incubation at 37°C. The level of protein leakage was measured at two time points (0 h and 24 h). All experimental groups were performed in triplicate under rigorously aseptic conditions to ensure the reliability of the results.

**Intracellular nucleic acid leakage under Co/Cu-MOF stress**

Agarose gel electrophoresis was employed to analyze nucleic acid leakage and evaluated cell membrane integrity in bacterial. *E. coli* and *S. aureus* cells in the logarithmic growth phase were treated with Co/Cu-MOF at final concentrations of 0, 1.0, 2.0, and 4.0×MIC, followed by incubation at 37°C for 24 h. After treatment, bacterial cells were harvested via centrifugation, and nucleic acid was extracted using a commercial DNA extraction kit. The extracted nucleic acid samples were subjected to agarose gel electrophoresis analysis.


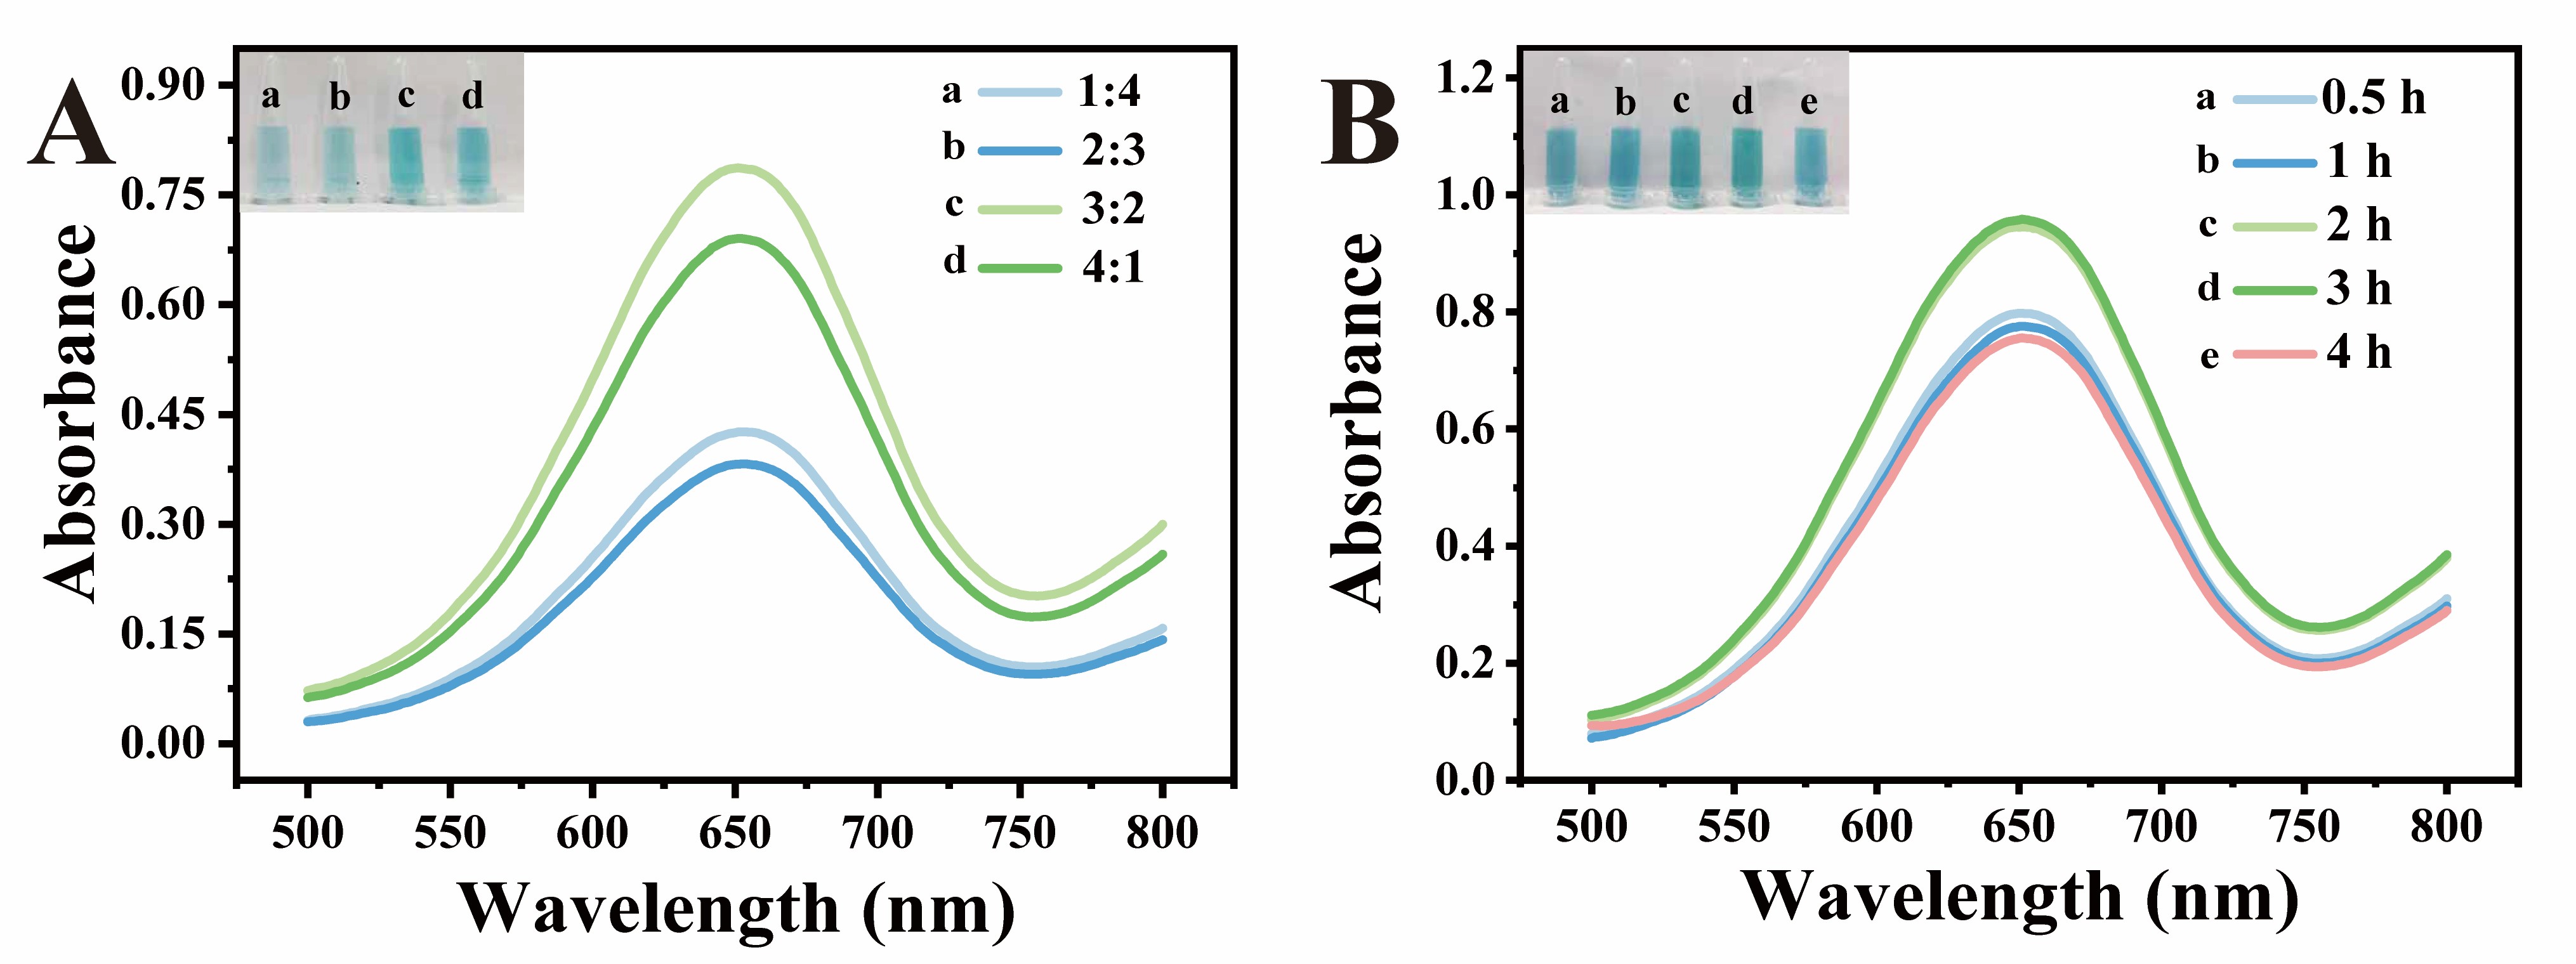


Fig. S1 Optimization of synthesis parameters for Co/Cu-MOF. (A) UV-vis absorption spectra and visual color changes of TMB in the reaction systems with various catalysts at different Co2+:Cu2+ mass ratio. (B) UV-vis absorption spectra and visual color changes of TMB in the reaction systems containing Co/Cu-MOF synthesized over 0.5, 1, 2, 3, and 4 h.


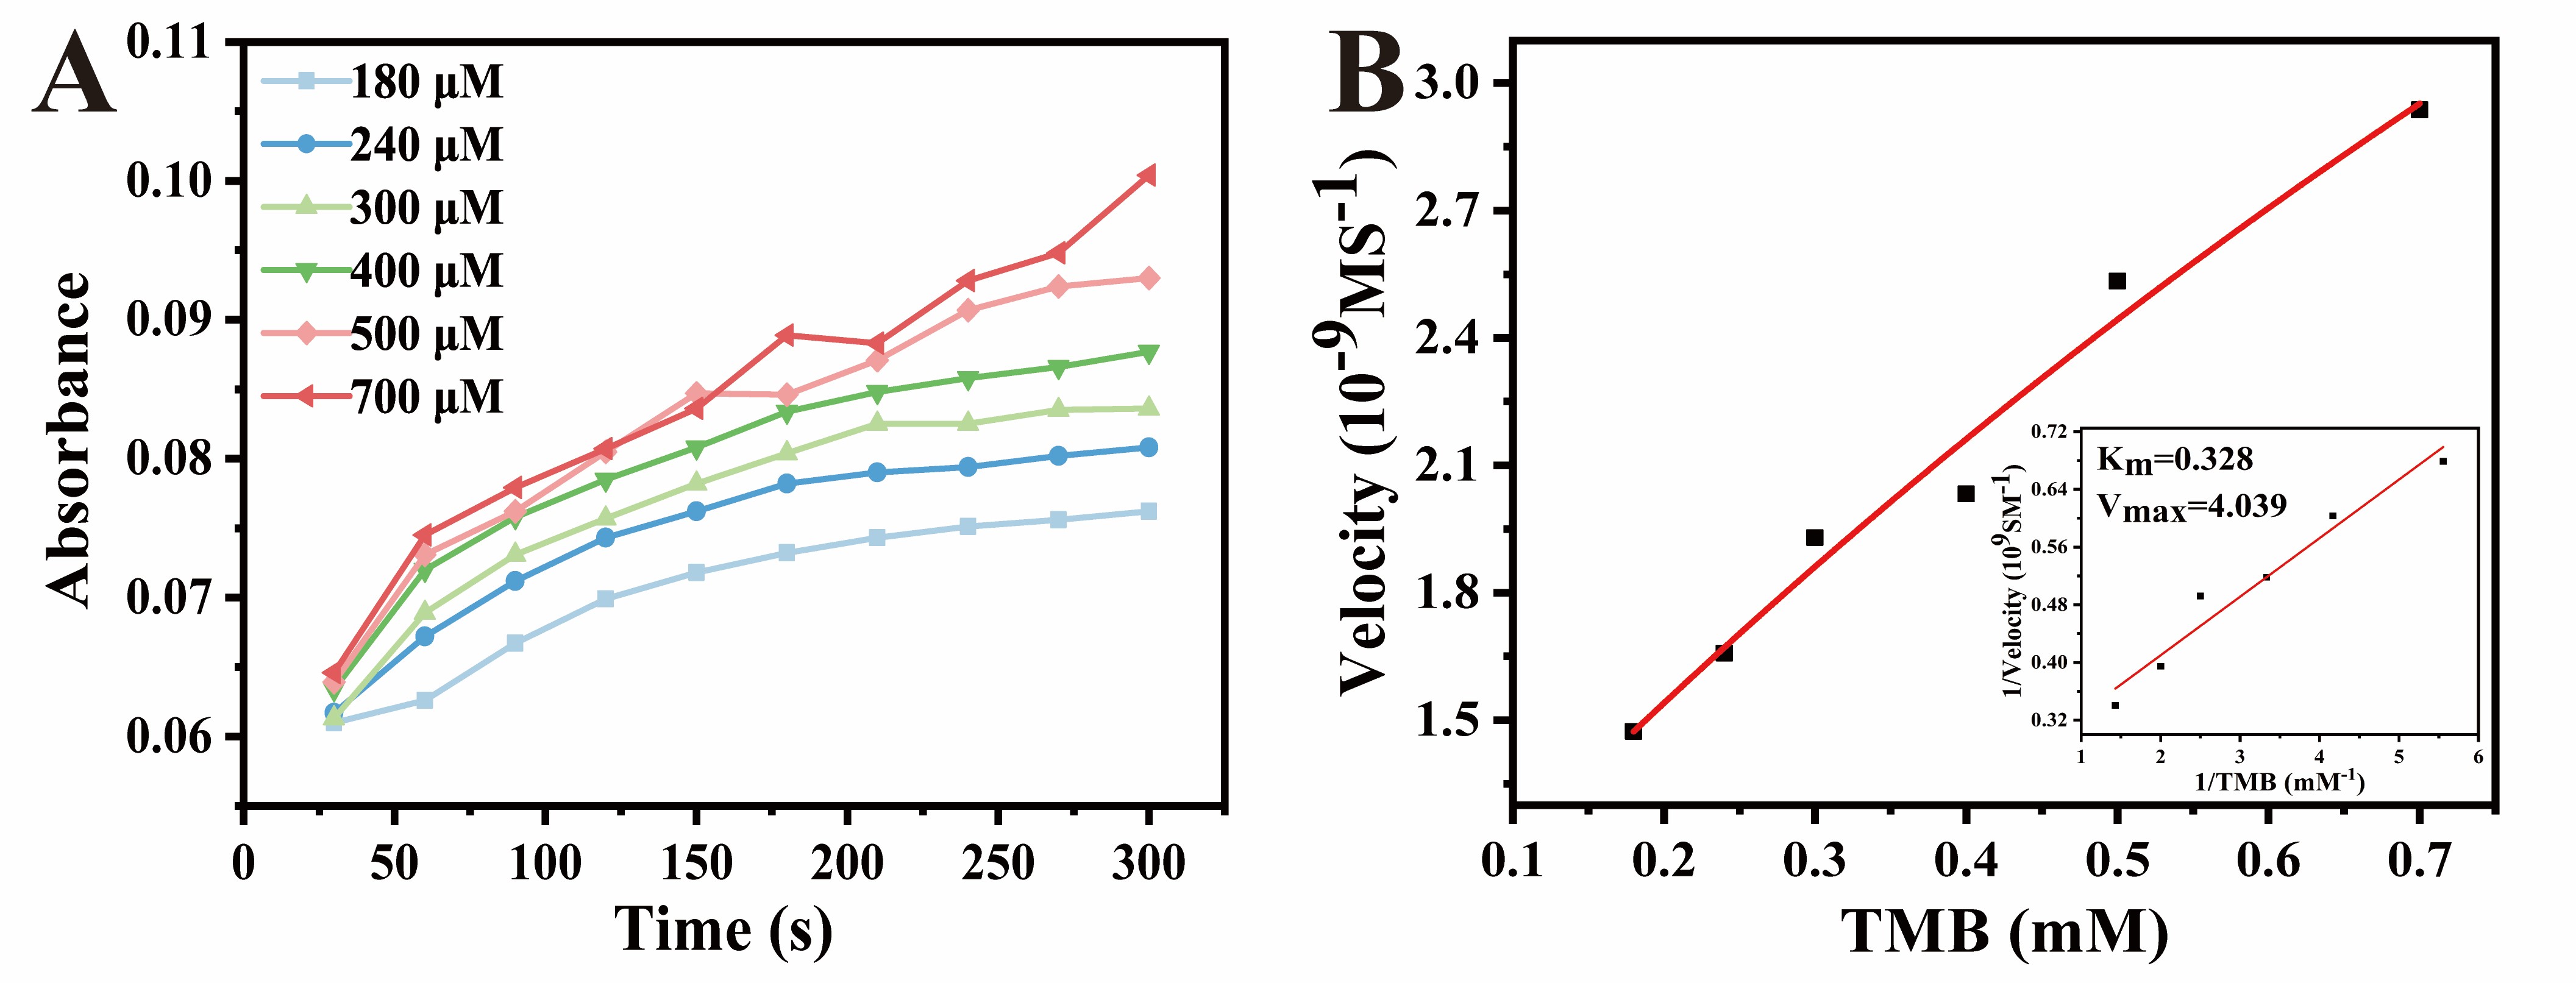


Fig. S2. (A) Changes in the UV-vis absorbance values of the Co-MOF-TMB system at 652 nm with time and TMB concentration. (B) The Michaelis-Menten curve of Co-MOF at different TMB concentrations (inset: corresponding double reciprocal plots).


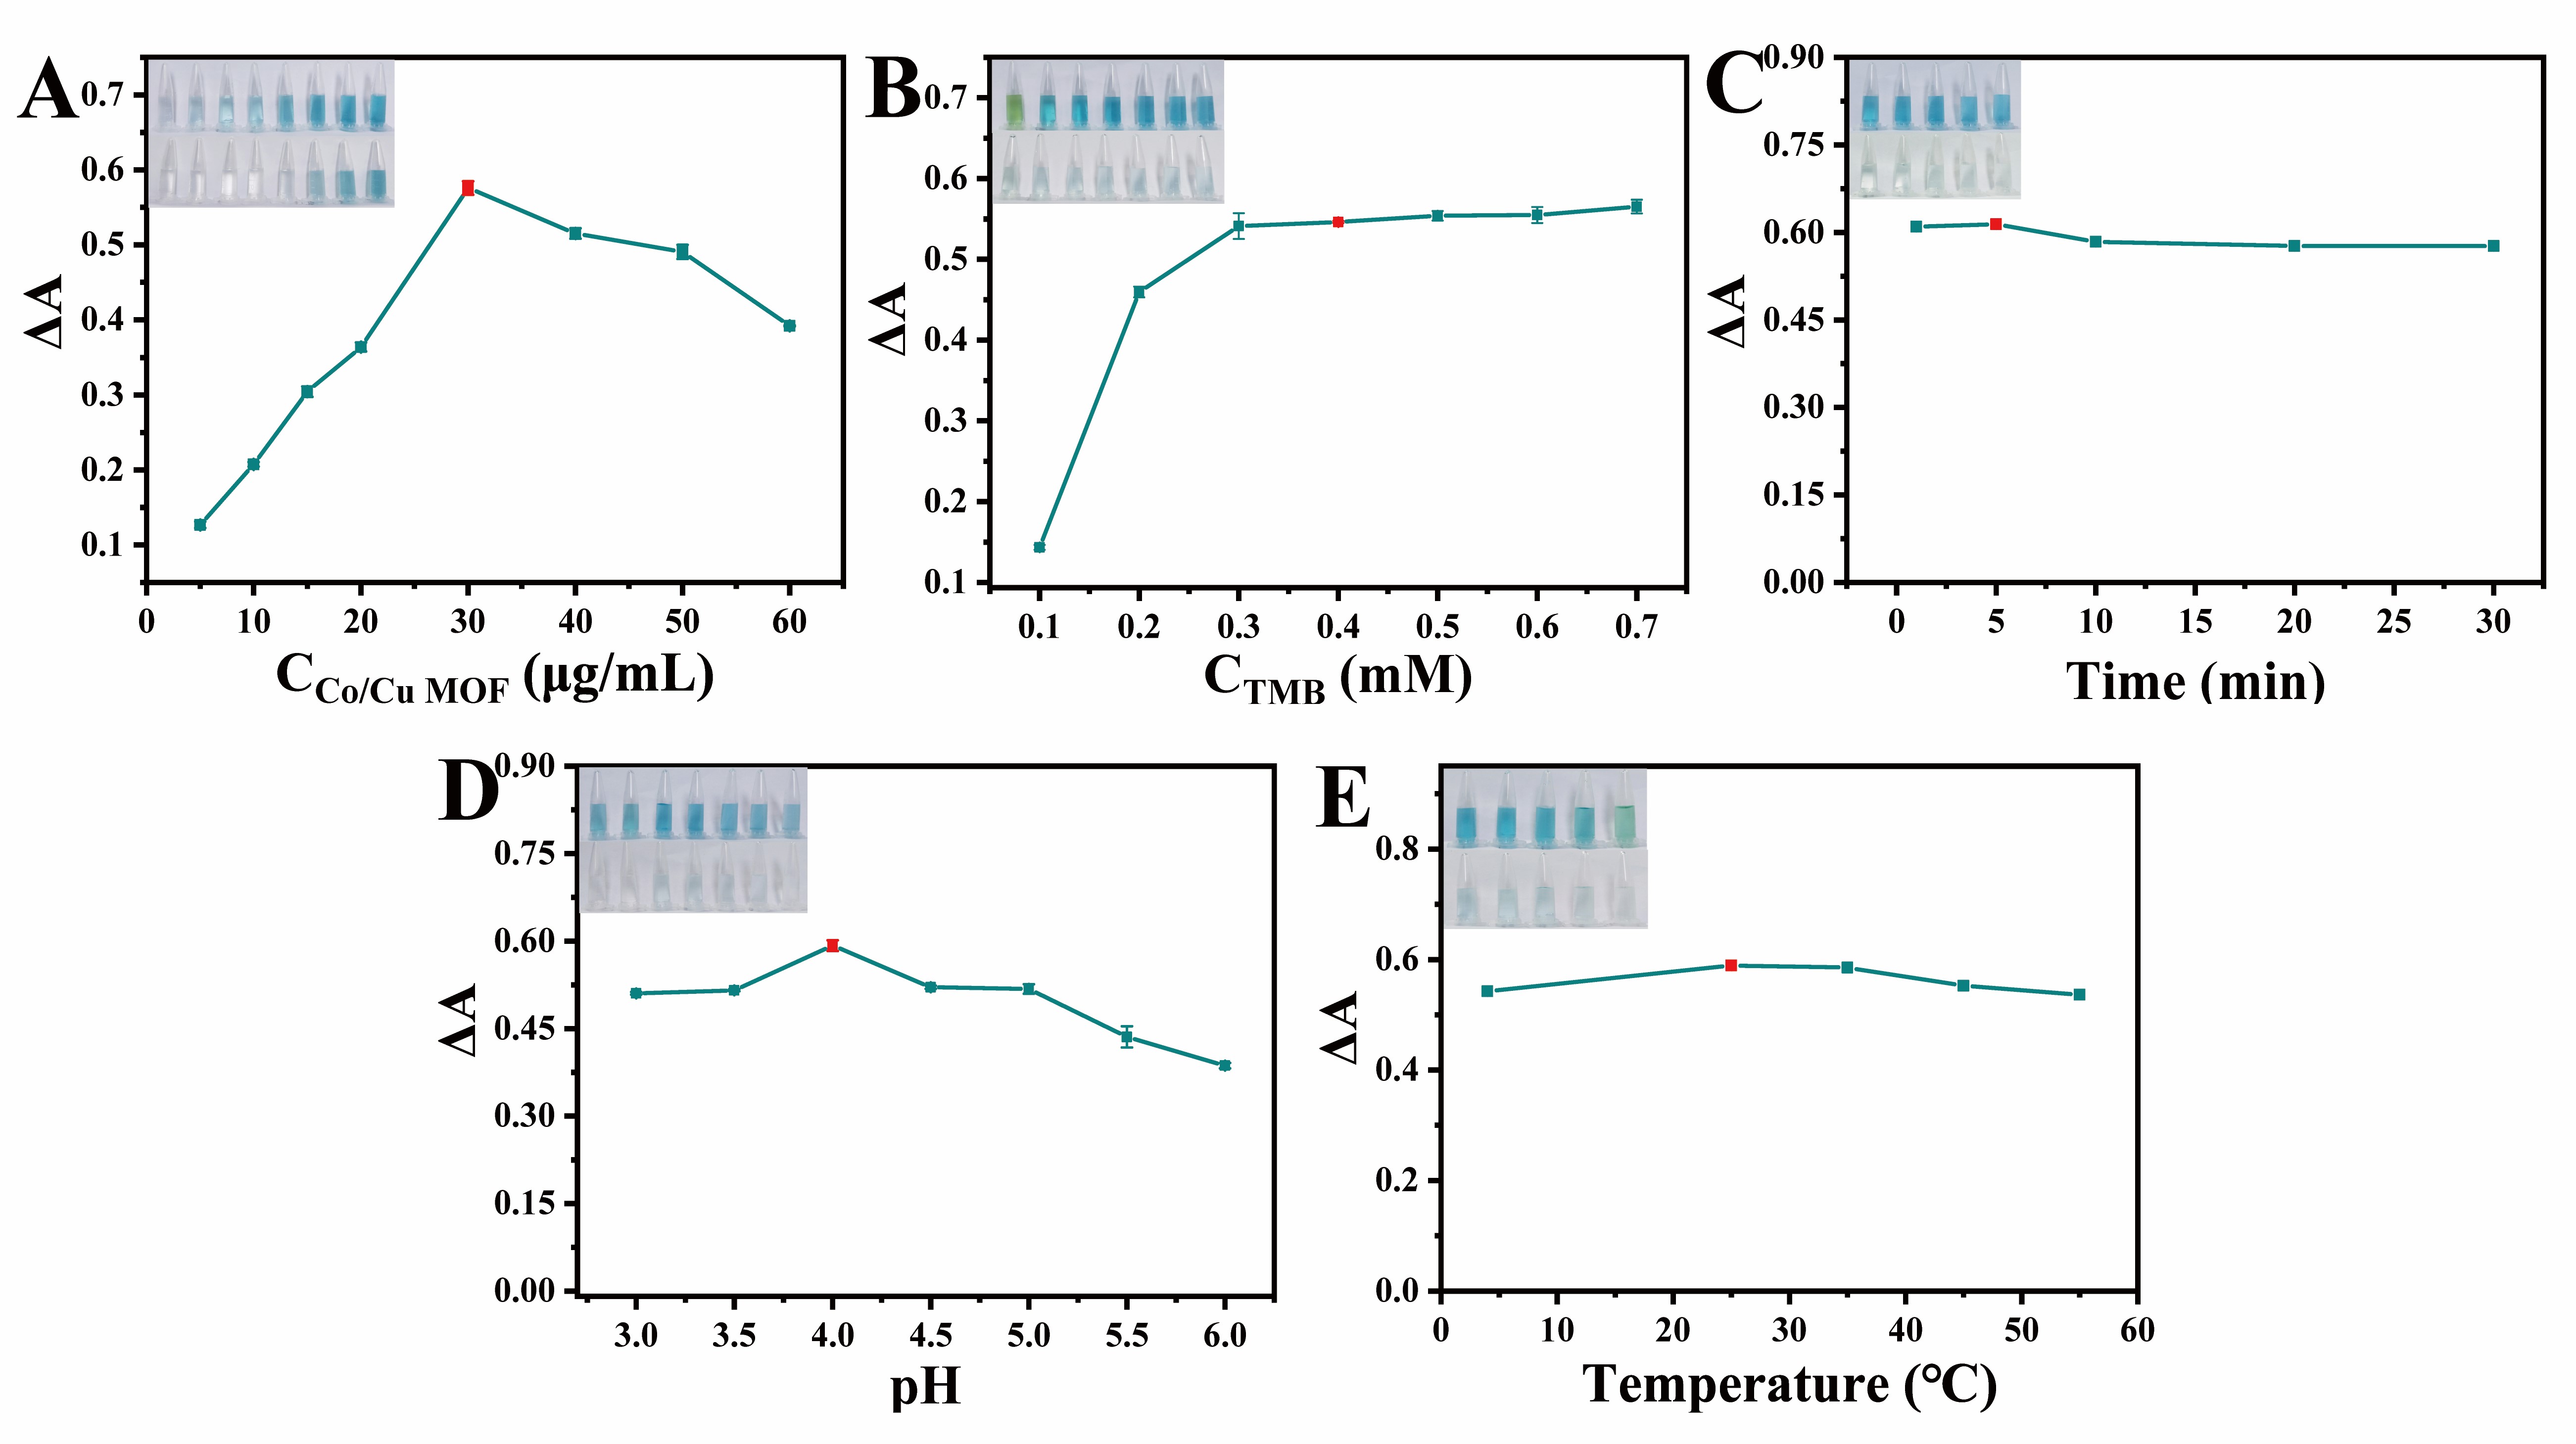


Fig. S3. Parameter optimization for the colorimetric detection system. (A) Effect of Co/Cu-MOF concentration; (B) Effect of TMB concentration; (C) Effect of reaction time; (D) Effect of pH; (E) Effect of reaction temperature. Inset is the corresponding photographs.


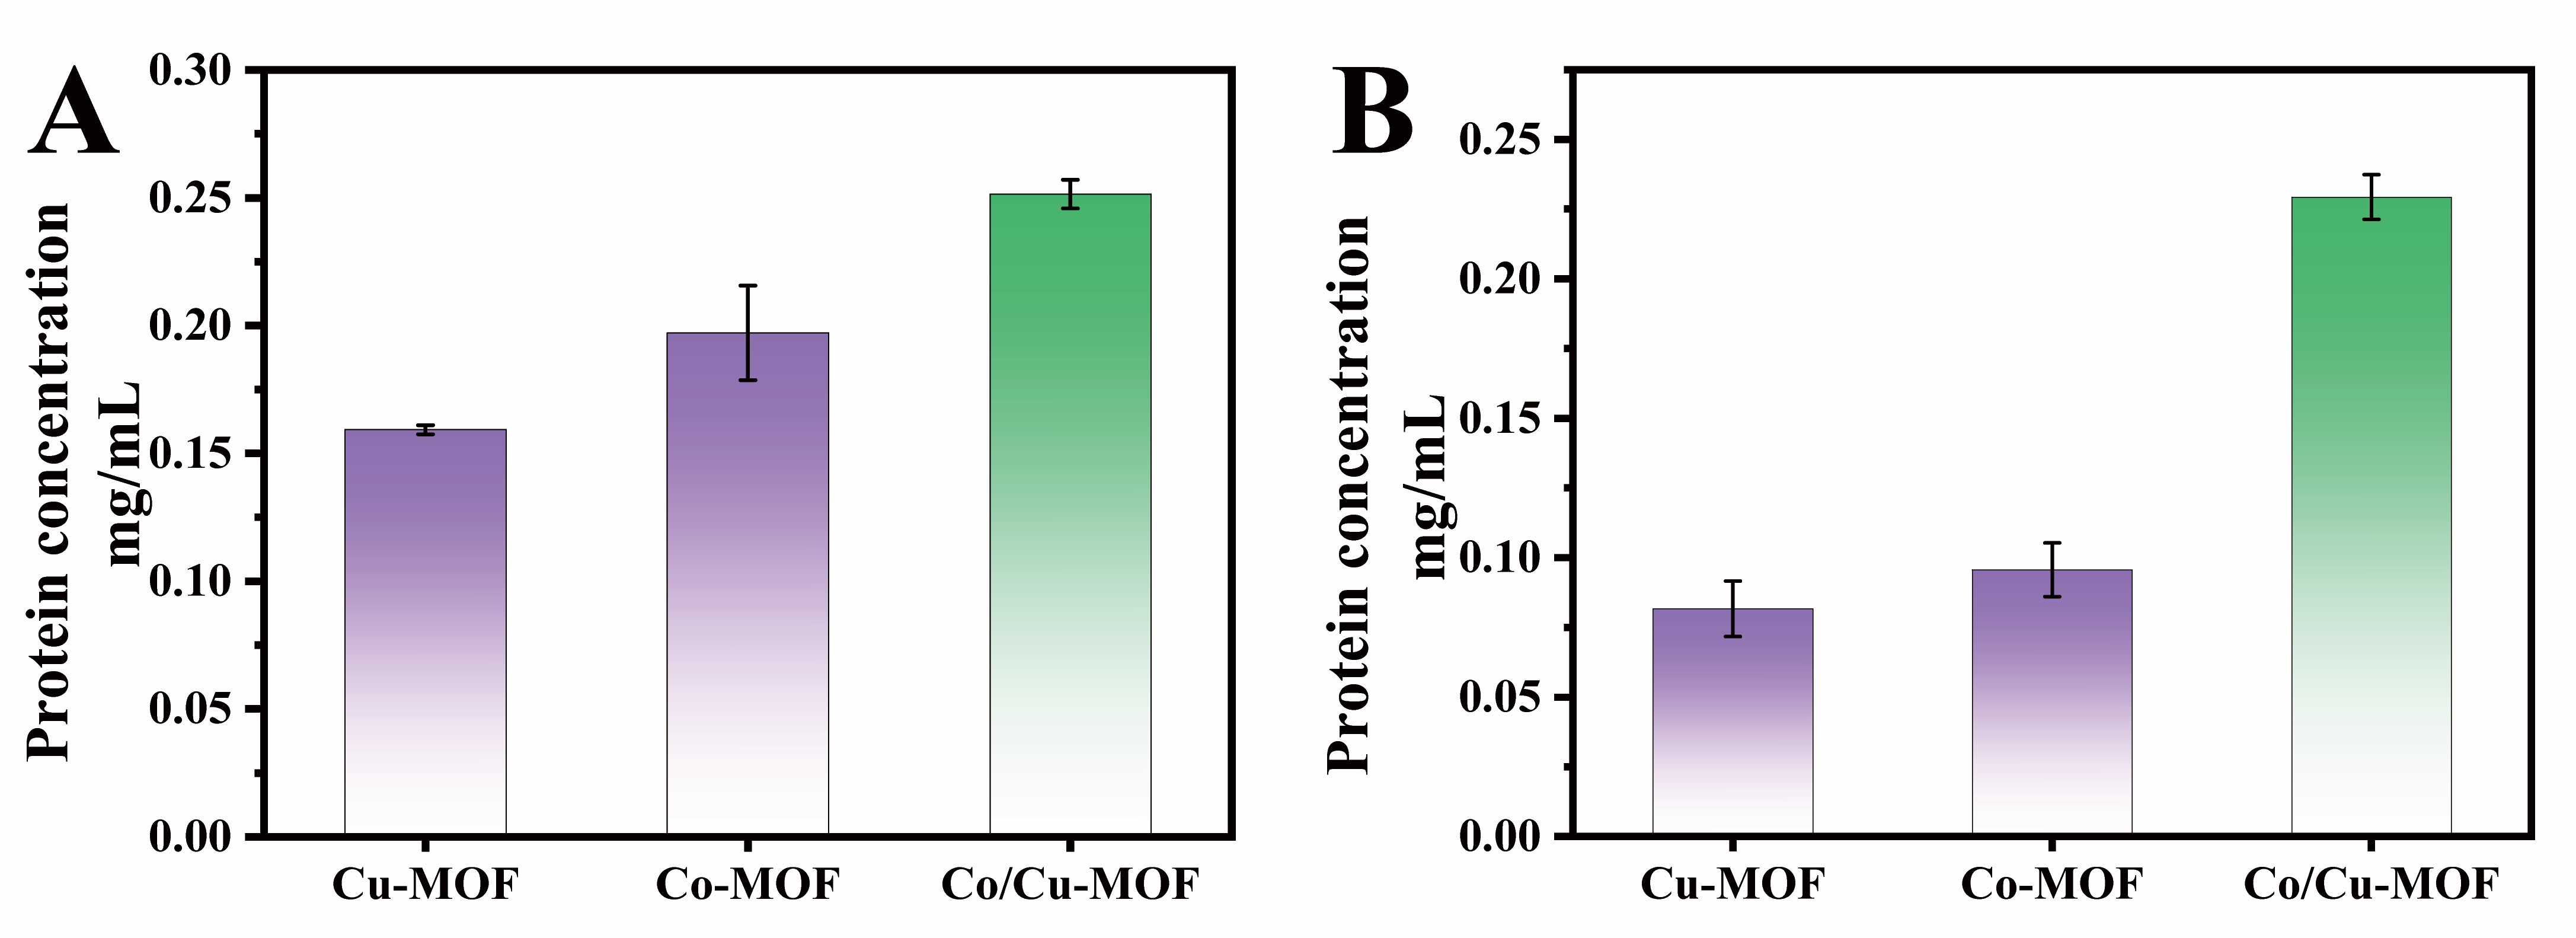


Fig. S4. Leakage of protein from (A) *E. coli* and (B) *S. aureus* after the treatment with Cu-MOF, Co-MOF and Co/Cu-MOF.


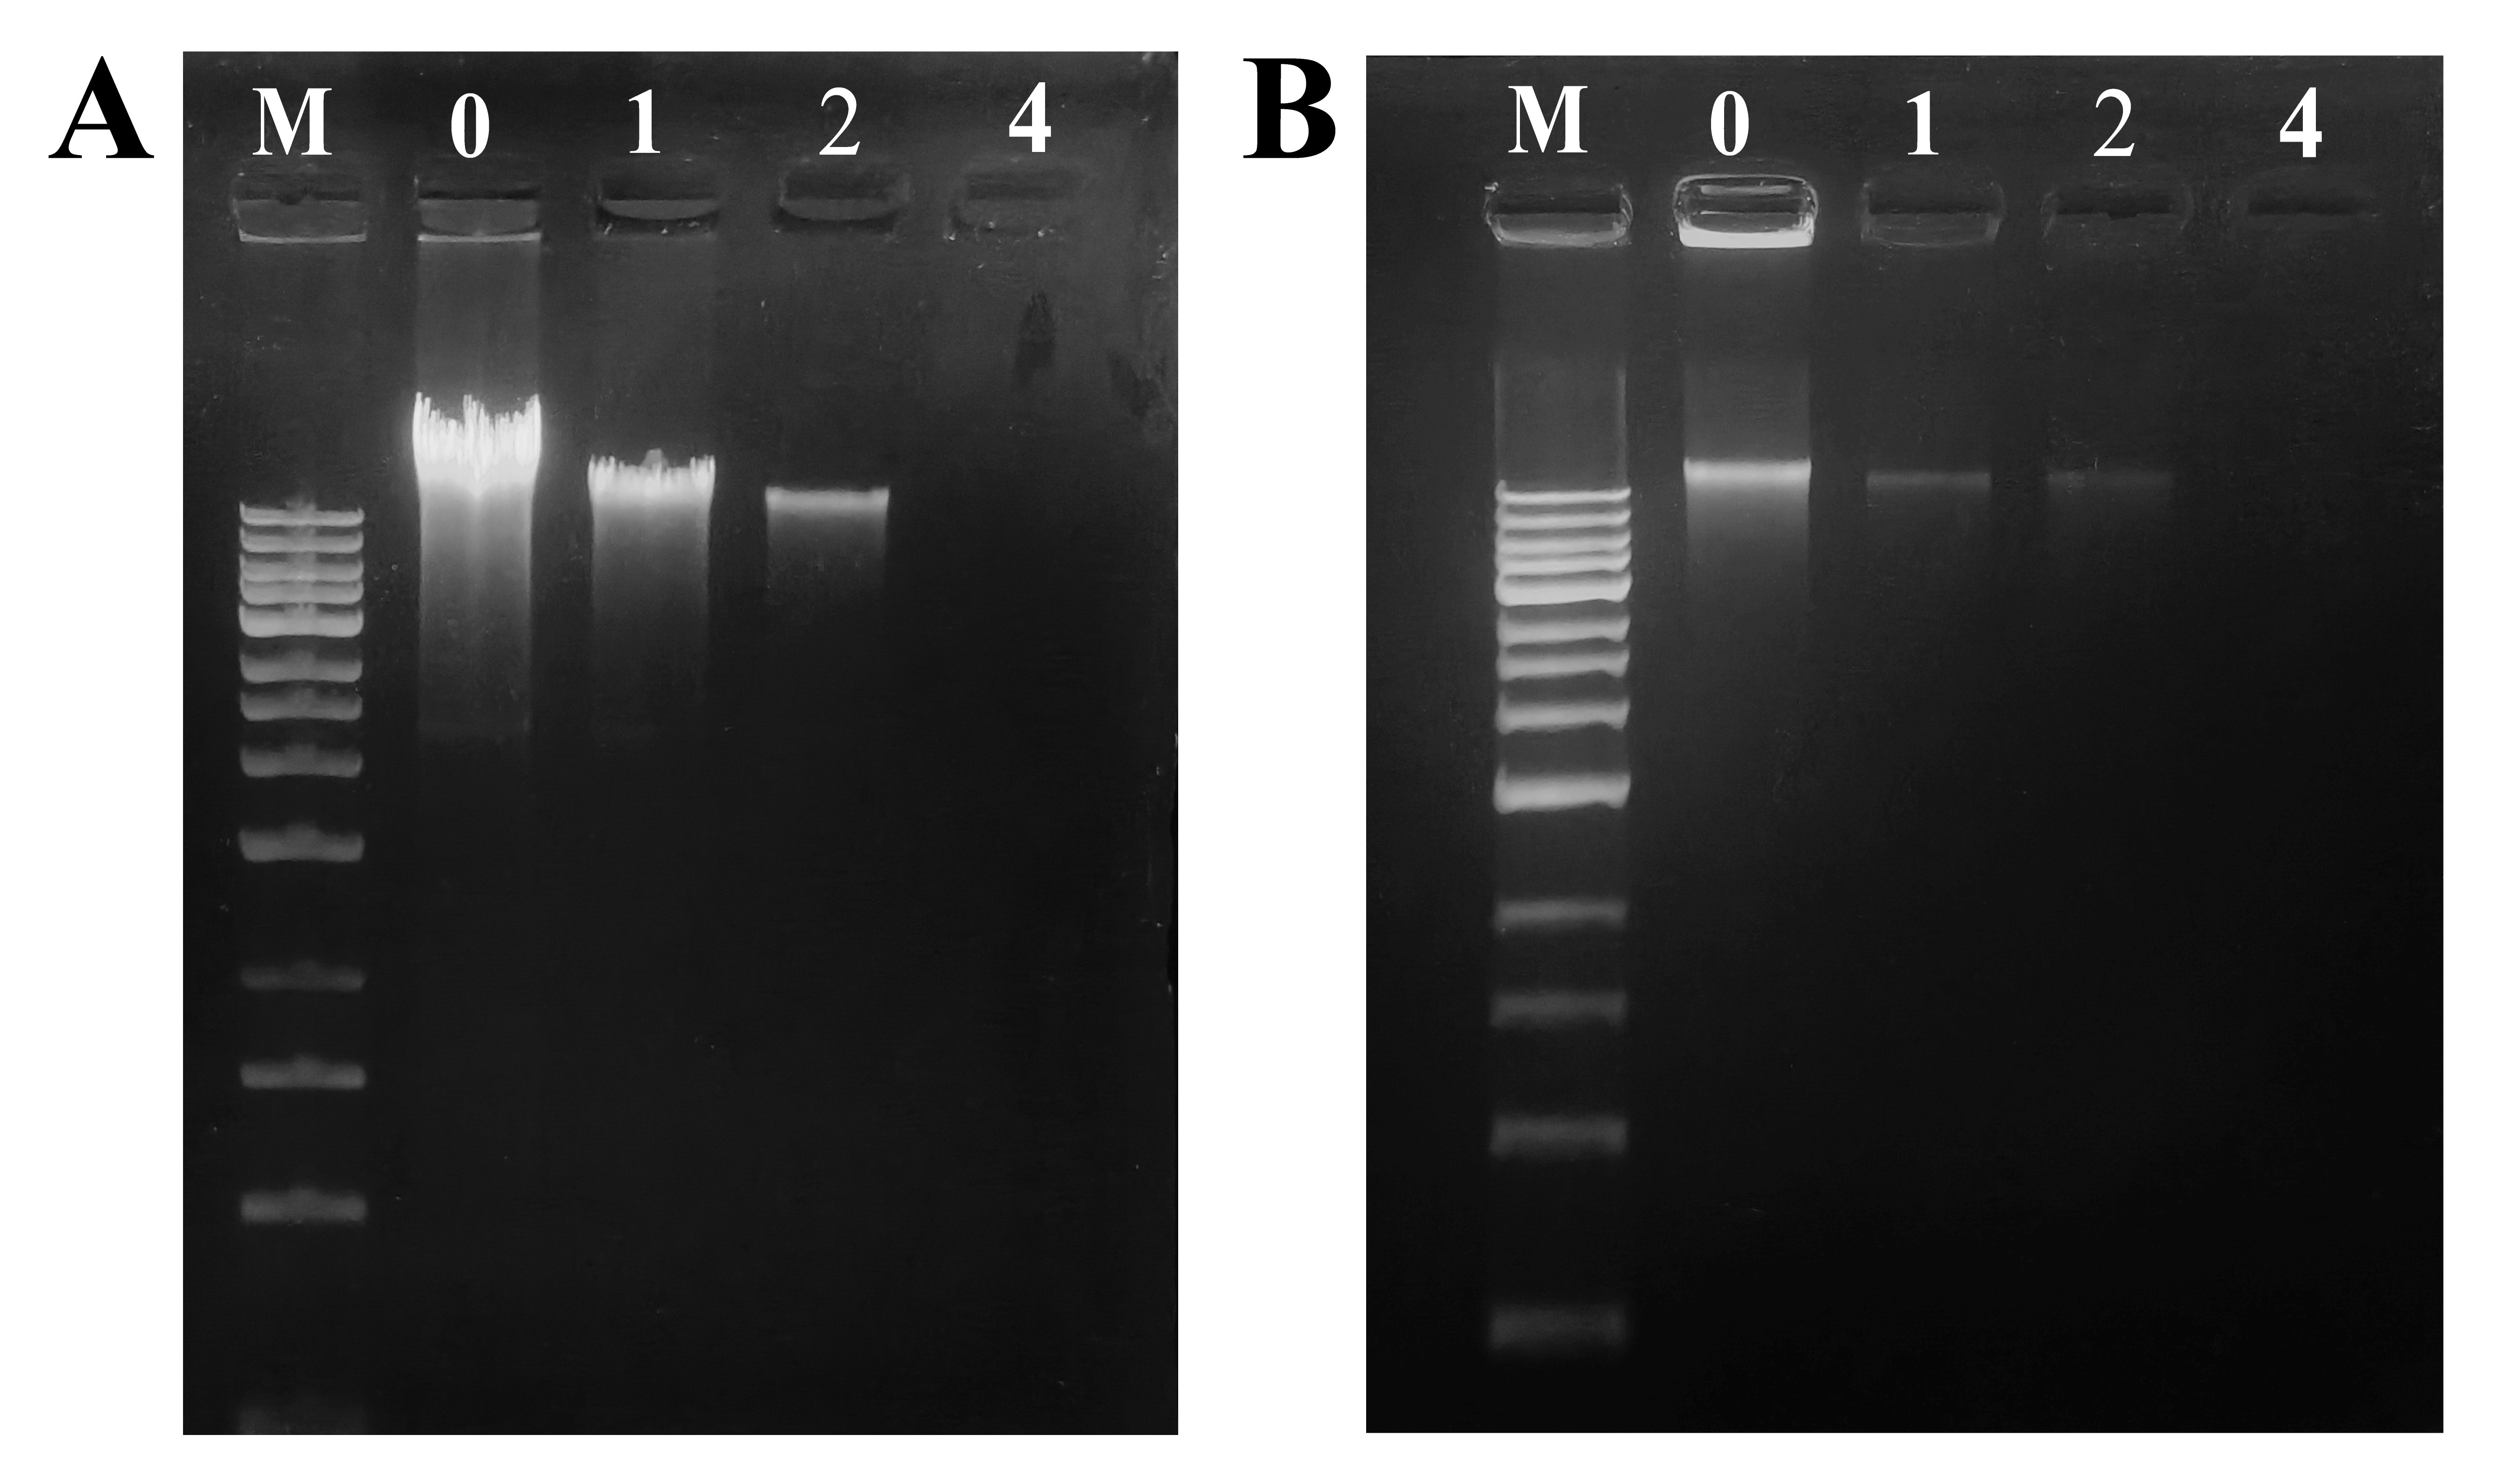


Fig. S5. Agarose gel electrophoresis analysis of genomic DNA from *E. coli* (A) and *S. aureus* (B) treated with various concentrations of the Co/Cu-MOF.

Table S1. Comparison of Km and Vmax of Co/Cu-MOF with some reported nanozymes.

| Catalyst | Km（mM） | Vmax（10-7 M s-1） | Reference |
| --- | --- | --- | --- |
| CuAg nanoflowers | 0.364 | 0.916 | [2] |
| Ag@ZnS | 4.22 | 0.74 | [3] |
| Fe-N/P-C SAzymes | 0.823 | 1.6103 | [4] |
| PDA-PdCu | 0.127 | 0.8611 | [5] |
| Co/Cu-MOF | 0.122 | 2.591 | This Work |

Table S2. Comparison of the present method with recently reported methods for AA detection.

| Analytical  method | Material | Linear range (µM) | LOD (µM) | Reference |
| --- | --- | --- | --- | --- |
| Colorimetric | scandium-MOF | 0.2-20 | 0.174 | [6] |
| Colorimetric | Ce-BPyDC | 1-20 | 0.28 | [7] |
| Colorimetric | MVCM MOF | 20-500 | 3.57 | [8] |
| Smartphone | Fe-P/N-C SAN | 0.5-100 | 0.315 | [4] |
| Fluorescence | MnO2 nanosheets | 1.5-100 | 0.45 | [9] |
| Fluorescence | Eu MOF | 0-3 | 0.32 | [10] |
| Colorimetric | Co/Cu-MOF | 0.1-28 | 0.091 | This work |

Table S3. Comparison of the present method with recently reported methods for ALP detection.

| Analytical  method | Material | Linear range (U/L) | LOD (U/L) | Reference |
| --- | --- | --- | --- | --- |
| Fluorescence | AgNCs | 1-100 | 0.63 | [11] |
| Fluorescence | Fe/Eu-MOF | 1-200 | 0.6 | [12] |
| Fluorescence | Ce(Ⅳ) | 0-250 | 2.3 | [13] |
| Fluorescence | Cu-C3N4-550 | 1-30 | 0.42 | [14] |
| Colorimetric | PDA | 1-200 | 2.8 | [15] |
| Colorimetric | N-CQD | 5-360 | 1.1 | [16] |
| Colorimetric | Co/Cu-MOF | 0.2-6.5 | 0.12 | This work |

Table S4. Results of detecting AA in human serum samples.

| Sample | Add (µM) | Total (µM) | Recovery (%) | RSD (%, n=3) |
| --- | --- | --- | --- | --- |
| Human serum | 0 | 0.25 | / | 1.06 |
| 0.5 | 0.747 | 99.47 | 1.91 |
| 5 | 5.198 | 98.95 | 0.43 |
| 10 | 9.442 | 91.92 | 3.35 |

Table S5. Results of detecting ALP in human serum samples.

| Sample | Adde (U/L) | Total (U/L) | Recovery (%) | RSD (%, n=3) |
| --- | --- | --- | --- | --- |
|  | 0 | 1.53 | / | 0.22 |
| Human serum | 0.5 | 2.06 | 106 | 0.25 |
| 1 | 2.6 | 107 | 0.78 |
|  | 2 | 3.7 | 108.5 | 1.89 |

**Reference**

[1] Zhao ZY, Li PJ, Xie RS, Cao XY, Su DL, Shan Y (2022) Biosynthesis of silver nanoparticle composites based on hesperidin and pectin and their synergistic antibacterial mechanism. Int J Biol Macromol 214:220-229. https://doi.org/10.1016/j.ijbiomac.2022.06.048.

[2] Sang YC, Wu PC, Ge J, Cao YY, Xiao Y, Yang YH, Wang CY, Li ZH, Cai R (2025) Bimetallic CuAg nanoflowers with high nanozyme activity for detection of acid phosphatase. Microchem J 213:113808. https://doi.org/10.1016/j.microc.2025.113808.

[3] Tian L, Huang ZJ, Lu XH, Wang TJ, Cheng WJ, Yang HM, Huang TZ, Li TX, Li Z, (2023) Plasmon-mediated oxidase-like activity on Ag@ZnS heterostructured hollow nanowires for rapid visual detection of nitrite. Inorg Chem 62:1659-1666. https://doi.org/10.1021/acs.inorgchem.2c04092.

[4] Li Y, Javed R, Li R, Zhang YY, Lang ZY, Zhao HB, Liu X, Cao HM, Ye DX (2023) A colorimetric smartphone-based sensor for on-site AA detection in tropical fruits using Fe-P/NC single-atom nanoenzyme. Food Chem 406:135017. https://doi.org/10.1016/j.foodchem.2022.135017.

[5] Zhang CH, Liu WD, Li Z, Yan BS, Lin JT, Chen CX, Zhang LB, Lu YZ (2022) Accelerated mimetic oxidase activity of polydopamine-dressed PdCu nanozyme for the detection of ascorbic acid related bioenzymes. ACS Sustainable Chem Eng 10:1653-1663. https://doi.org/10.1021/acssuschemeng.1c07568.

[6] Su YQ, Wu HJ, Chen JQ, Li HQ, Lin PC, Xiao W, Cao DL (2023) Novel scandium-MOF nanocrystals as peroxidase-mimicking nanozymes for highly sensitive colorimetric detection of ascorbic acid in human serum. CrystEngComm 25:3472-3483. https://doi.org/10.1039/D2CE01023B.

[7] Luo LP, Huang LJ, Liu XN, Zhang WT, Yao XL, Dou LN, Zhang X, Nian Y, Sun J, Wang JL (2019) Mixed-valence Ce-BPyDC metal-organic framework with dual enzyme-like activities for colorimetric biosensing. Inorg Chem 58:11382-11388. https://doi.org/10.1021/acs.inorgchem.9b00661.

[8] Fu MJ, Xu F, Yan JT, Wang CL, Fan GZ, Song GS, Chai B (2022) Mixed valence state cerium metal organic framework with prominent oxidase-mimicking activity for ascorbic acid detection: Mechanism and performance. Colloids Surf, A 641:128610. https://doi.org/10.1016/j.colsurfa.2022.128610.

[9] Zhang J, Chen RC, Chen QZ, Hu YM, Pan S, Hu XL (2021) Ratiometric fluorescent probe for ascorbic acid detection based on MnO2 nanosheets, gold nanoclusters and thiamine. Colloids Surf, A 622:126605. https://doi.org/10.1016/j.colsurfa.2021.126605.

[10] Dong XX, Chen TL, Kong XJ, Wu S, Kong FF, Xiao Q (2024) A facile fluorescence Eu MOF sensor for ascorbic acid and ascorbate oxidase detection. Anal Methods 16:704-708. https://doi.org/10.1039/D3AY01978K.

[11] He Y, Jiao BN (2017) Determination of the activity of alkaline phosphatase based on the use of ssDNA-templated fluorescent silver nanoclusters and on enzyme-triggered silver reduction. Microchimica Acta 184:4167-4173. https://doi.org/10.1007/s00604-017-2459-x.

[12] Shi W, Li TZ, Chu N, Liu X, He MQ, Bui B, Chen ML, Chen W (2021) Nano-octahedral bimetallic Fe/Eu-MOF preparation and dual model sensing of serum alkaline phosphatase (ALP) based on its peroxidase-like property and fluorescence. Mater Sci Eng C 129:112404. https://doi.org/10.1016/j.msec.2021.112404.

[13] Song HW, Wang HY, Li X, Peng YX, Pan JM, Niu XH (2018) Sensitive and selective colorimetric detection of alkaline phosphatase activity based on phosphate anion-quenched oxidase-mimicking activity of Ce (Ⅳ) ions. Anal. Chim Acta 1044:154-161. https://doi.org/10.1016/j.aca.2018.09.045.

[14] Song YF, Huang CZ, Li YF (2023) Nanozymes from Cu (II) metal-organic gel and melamine for highly active peroxidase-like activity to detect alkaline phosphatase. ACS Appl Nano Mater 6:1369-1378. https://doi.org/10.1021/acsanm.2c05009.

[15] Chen YW, Zhao L, Zhang BS, Guan YQ, Yao C, Xu X (2023) Fe-N hollow mesoporous carbon spheres with high oxidase-like activity for sensitive detection of alkaline phosphatase. Analyst 148:2825-2833. https://doi.org/10.1039/D3AN00475A.

[16] Wang DE, You SQ, Huo WJ, Han X, Xu HY (2022) Colorimetric detection of alkaline phosphatase activity based on pyridoxal phosphate-induced chromatic switch of polydiacetylene nano-liposomes. Microchimica Acta 189:70. https://doi.org/10.1007/s00604-022-05175-y.
