# Supplementary figures and images for: Fabrication of 2D Bimetallic Metal-Organic Frameworks with Enhanced Oxidase-Like Activity for AA/ALP Sensing and Antibacterial Application
Source: Research Square preprint supplement (doi:10.21203/rs.3.rs-8847666/v1), 2026-02-24

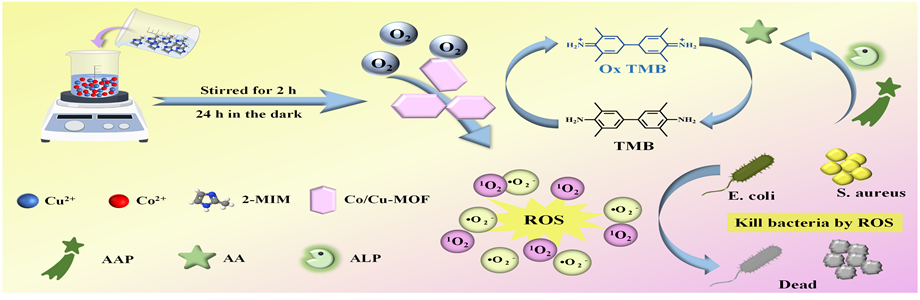

Supplement: Supplementary file 2 [file 7a31fedc2f1eb42b620b9435.docx]
